# Supplementary material
Source: PubMed Central journal article supplement (PMC3939856)

# SUPPLEMENTARY FIGURE 1

A.

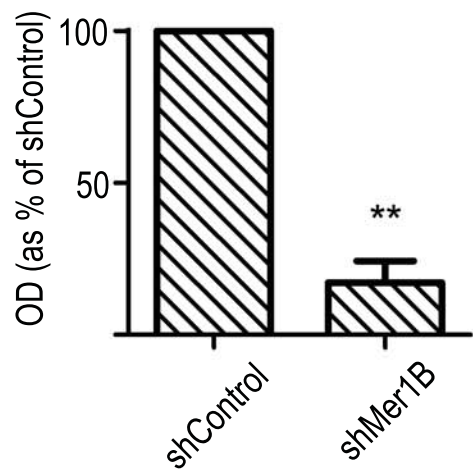

Supplement: NIHMS552719-supplement-Suppl_1.pdf [file NIHMS552719-supplement-Suppl_1.pdf]

# SUPPLEMENTARY FIGURE 2

A.

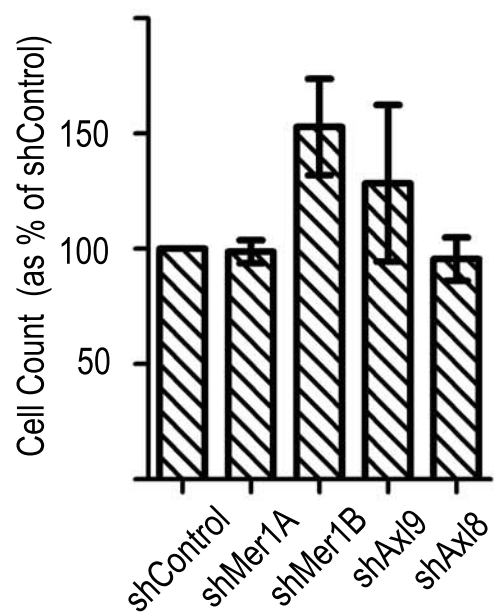

Supplement: NIHMS552719-supplement-Suppl_2.pdf [file NIHMS552719-supplement-Suppl_2.pdf]
